# Supplementary material
Source: PubMed Central journal article supplement (PMC3797457)
Supplement: Supp_Fig1.pdf [file Supp_Fig1.pdf]

## Supplementary Data

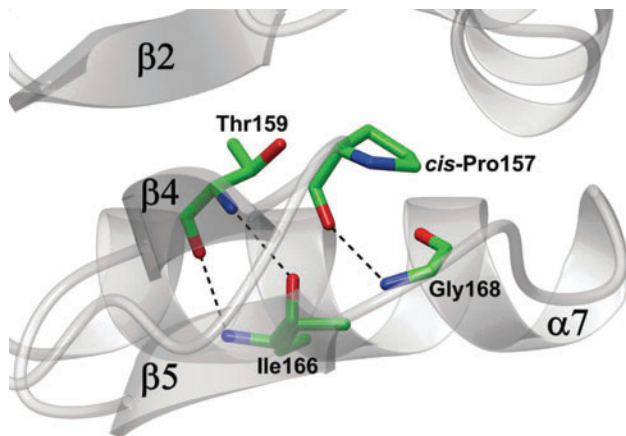

**SUPPLEMENTARY FIG. S1.** Hydrogen bond stabilization of the  $\beta 5$ - $\alpha 7$  loop of ScsC protein of *S. Typhimurium* (StScsC). Hydrogen bonds between Ile<sup>166</sup> (O and NH) and Thr<sup>159</sup> (NH and O) and Gly<sup>168</sup> (NH) and cis-Pro<sup>157</sup> are shown as dashed lines.
