# Supplementary material
Source: PubMed Central journal article supplement (PMC3797457)
Supplement: Supp_Fig2.pdf [file Supp_Fig2.pdf]

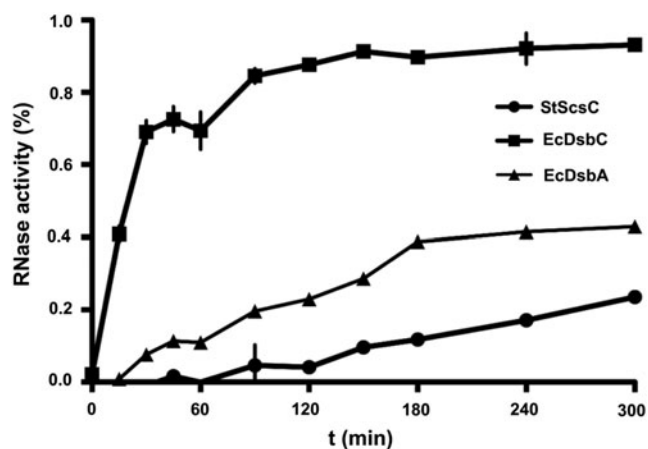

SUPPLEMENTARY FIG. S2. *In vitro* refolding of scrambled RNaseA (scRNaseA). scRNaseA (40 mM) was incubated in a 0.1 M sodium phosphate buffer, pH 7.0, 1 mM EDTA, 10 mM dithiothreitol (DTT) in the presence of 10 mM EcDsbC (■), 10 mM EcDsbA (▲), or 10 mM StScsC (●). RNaseA activity was measured by monitoring cCMP hydrolysis spectrophotometrically at 296 nm. As positive and negative controls, we performed two additional reactions with folded RNaseA and scRNaseA, respectively, and without any additional enzyme. The former was normalized to 100% RNaseA activity and the latter was subtracted from all measurements. After 300 min, EcDsbC, EcDsbA, and StScsC catalyzed the recovery of 90%, 40%, and 20% of the oxidized scRNaseA, respectively.
