# Supplementary material
Source: PubMed Central journal article supplement (PMC3797457)
Supplement: Supp_Fig3.pdf [file Supp_Fig3.pdf]

|        |     |            |            |            |            |            |            |            |            |     |
|--------|-----|------------|------------|------------|------------|------------|------------|------------|------------|-----|
|        |     | 10         | 20         | 30         | 40         | 50         | 60         | 70         | 80         |     |
| StScsC | 1   | .....      | .....      | .....      | .....      | .....      | .....      | .....      | .....      | 43  |
| CcScsC | 1   | GCDQSKPKA  | FGEKVRAYLL | EHPEVLMEA- | -SQKLQEQQA | AQAVSSCKA  | IGEY-RQALE | RDERDIVINP | AGT-IVTEF  | 76  |
|        |     | 90         | 100        | 110        | 120        | 130        | 140        | 150        | 160        |     |
| StScsC | 44  | TDYNCYCKQ  | LDPMLEKIVQ | KMPDVAVIIK | PLPFKGESEV | LAARIALTTW | REHPQQFLAL | HEKIMOKRVY | HTDDSIKQAO | 123 |
| CcScsC | 77  | EDYRCYCRQ  | ATPAVLEIVQ | KPEDIRLVLK | DFVIEGNDSE | AAARIALGA- | KDQGKS-LEL | HKALMAENAL | DARGALRIE  | 154 |
|        |     | 170        | 180        | 190        | 200        | 210        | 220        | 230        |            |     |
| StScsC | 124 | QKA---G-AT | FVTLDEKSME | TIRTNLQLAR | LVGVGGTPAT | IIGDELIPGA | VPWDTLEAVV | KE-KLASANG | G          | 189 |
| CcScsC | 155 | RLGIDMDKAK | AVGESQAITQ | HLADTDALAR | ALNLSGTPAF | IVGDILVPGA | -DIDATKLAI | EQTRAARAKA | G          | 224 |

**SUPPLEMENTARY FIG. S3. Pairwise sequence comparison of ScsC from *S. Typhimurium* (StScsC) and *C. crescentus* (CcScsC).** Sequences lack targeting peptides. Blosom matrix was used, where sequence ends are permitted to slide over one another. Sequence identities (black shading) and similarities (gray shading) were 24% and 40%, respectively. The conserved *cis*-proline residues are denoted by an asterisk. The ScsC sequence used for *C. crescentus* was CC\_1879 from strain CB15.
