# Supplementary material
Source: PubMed Central journal article supplement (PMC3797457)
Supplement: Supp_Fig4.pdf [file Supp_Fig4.pdf]

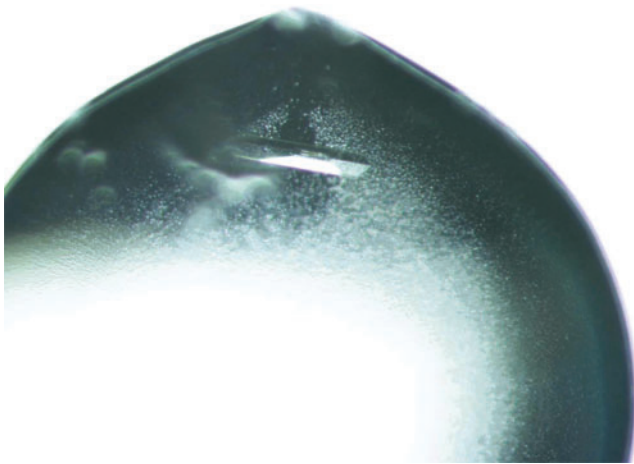

**SUPPLEMENTARY FIG. S4. Crystallization of ScsC from *S. Typhimurium*.** Crystallization buffer: 22% (w/v) PEG 4000 in 0.1 M Tris buffer pH 8.2.
