# Supplementary material
Source: PubMed Central journal article supplement (PMC3797457)
Supplement: Supp_Fig5.pdf [file Supp_Fig5.pdf]

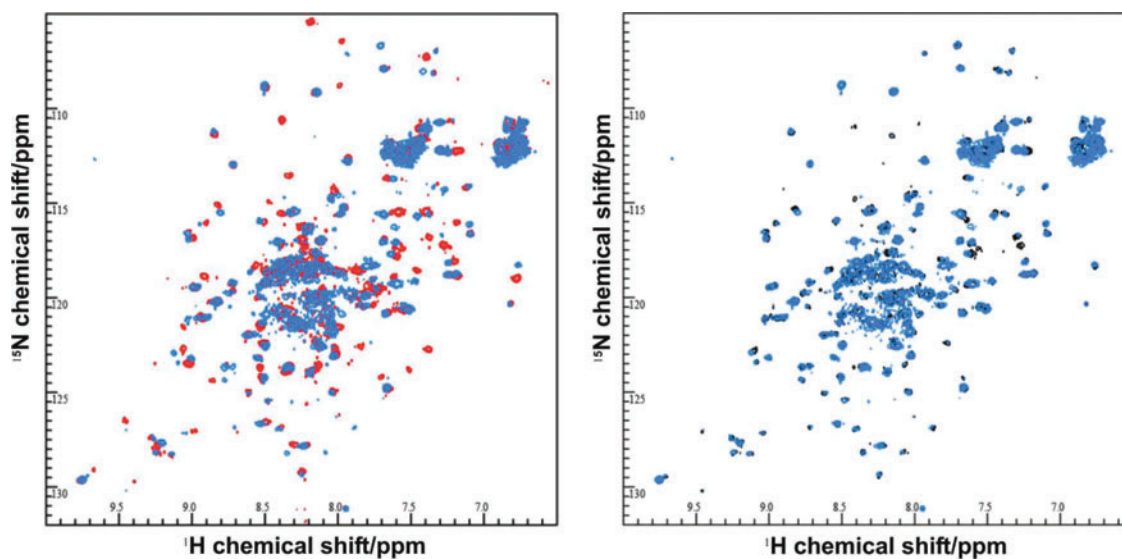

**SUPPLEMENTARY FIG. S5.**  $^{15}\text{N}$ - $^1\text{H}$  HSQC spectra of fully oxidized and fully reduced StScsC. The spectra in blue on both *panels* are the fully reduced sample (treated with 5 mM DTT). Spectra in red and black are taken from the reduced glutathione/oxidized glutathione titration, and are fully oxidized and fully reduced, respectively. The peaks selected to calculate the reduction potential overlay with the fully reduced DTT sample.
