# Supplementary material
Source: PubMed Central journal article supplement (PMC3797457)
Supplement: Supp_Table1.pdf [file Supp_Table1.pdf]

SUPPLEMENTARY TABLE S1. X-RAY DATA COLLECTION  
AND REFINEMENT STATISTICS FOR StScsC

| <i>Data collection</i>                                        | <i>ScsC</i>                                                  |
|---------------------------------------------------------------|--------------------------------------------------------------|
| Wavelength (Å)                                                | 1.5419                                                       |
| Resolution range (Å)                                          | 48.7–1.98 (2.05–1.98)                                        |
| Space group                                                   | $P2_1$                                                       |
| Unit cell dimensions (Å)                                      | $a=53.1, b=91.0, c=83.3$<br>$\alpha=\gamma=90, \beta=102.23$ |
| Observed reflections                                          | 790723                                                       |
| Unique reflections                                            | 106172                                                       |
| $R_{\text{merge}}^{\text{a}}$                                 | 0.06 (0.48)                                                  |
| Completeness (%) <sup>*</sup>                                 | 100 (100)                                                    |
| $\langle I \rangle / \sigma(I) >^*$                           | 13.0 (2.4)                                                   |
| Redundancy <sup>c</sup>                                       | 7.5 (7.3)                                                    |
| <i>Refinement</i>                                             |                                                              |
| Resolution (Å)                                                | 48.7–2.04                                                    |
| Completeness for range (%)                                    | 99.8                                                         |
| $R_{\text{factor}}^{\text{b}}$ (%) <sup>*</sup>               | 19.9 (43.7)                                                  |
| $R_{\text{free}}^{\text{c}}$ (%) <sup>*</sup>                 | 25.3 (47.9)                                                  |
| Number of non-H protein atoms                                 | 5503                                                         |
| Number of waters                                              | 411                                                          |
| Wilson B                                                      | 35.41                                                        |
| Average B factor (Å <sup>2</sup> )–All atoms                  | 45.32                                                        |
| Average B factor (Å <sup>2</sup> )–Water                      | 46.28                                                        |
| Average B factor (Å <sup>2</sup> )–Nonsolvent                 | 45.25                                                        |
| <i>R.m.s.d. from ideal geometry</i>                           |                                                              |
| Bonds (Å)                                                     | 0.008                                                        |
| Angles (°)                                                    | 1.003                                                        |
| <i>Molprobit analysis</i>                                     |                                                              |
| Residues in most favored/<br>additionally allowed regions (%) | 98.7/1.3                                                     |
| Residues with bad angles (%)                                  | 0                                                            |
| Poor rotamers (%)                                             | 2                                                            |
| Clashscore (percentile)                                       | 11.55 (76th)                                                 |
| Molprobit score (percentile)                                  | 1.81 (87th)                                                  |

<sup>\*</sup>Values in parentheses refer to the highest resolution shell.

<sup>a</sup> $R_{\text{merge}} = \sum |I - \langle I \rangle| / \sum \langle I \rangle$ , where  $I$  is the intensity of individual reflections.

<sup>b</sup> $R_{\text{fac}} = \sum_h |F_o - F_c| / \sum_h |F_o|$ , where  $F_o$  and  $F_c$  are the observed and calculated structure-factor amplitudes for each reflection "h."

<sup>c</sup> $R_{\text{free}}$  was calculated with 5% of the diffraction data selected randomly and excluded from refinement.
